# Supplementary material for: When a Woman Kills Her Man: Gender and Victim Precipitation in Homicide
Source: PubMed Central journal article supplement (PMC6537166; doi:10.1177/0886260519834987), 2019-03-08
Supplement: Appendix.pdf [file Appendix.pdf]

**Appendix 1: Association between homicide type and the dichotomous indicator of victim precipitation (VP), logistic regression.**

| <b>Model 1: Binary Measure of VP (N=1,494)</b> |              |             |             |              |
|------------------------------------------------|--------------|-------------|-------------|--------------|
|                                                | Beta         | 95 % C.I.   |             | OR           |
|                                                |              | Lower       | Upper       |              |
| <b>Homicide type<sup>a</sup></b>               |              |             |             |              |
| F-M not IPH (N=50)                             | -0.86*       | -1.61       | -0.10       | 0.42*        |
| F-F (N=21)                                     | -1.16*       | -2.30       | -0.02       | 0.31*        |
| M-F IPH (N=284)                                | -1.17*       | -1.72       | -0.63       | 0.31*        |
| M-F not IPH (N=141)                            | -2.40*       | -3.13       | -1.68       | 0.09*        |
| M-M (N=929)                                    | -0.94*       | -1.44       | -0.44       | 0.39*        |
| <b>Controls</b>                                |              |             |             |              |
| Victim's age                                   | -0.02*       | -0.03       | -0.01       | 0.98*        |
| Offender's age                                 | 0.01         | 0.00        | 0.02        | 1.01         |
| <b>Constant</b>                                | <b>1.13*</b> | <b>0.50</b> | <b>1.76</b> | <b>3.10*</b> |

$\chi^2=88.95$ , \* $p<0.05$

<sup>a</sup>Reference category F-MIPH (n=69)

**Appendix 2: Association between homicide type and the number of measures of victim precipitation (VP), negative binomial model.**

| <b>Model 2: Count Measure of VP (N=1,155)</b> |              |             |             |              |
|-----------------------------------------------|--------------|-------------|-------------|--------------|
|                                               | Beta         | 95 % C.I.   |             | IRR          |
|                                               |              | Lower       | Upper       |              |
| <b>Homicide type<sup>a</sup></b>              |              |             |             |              |
| F-M not IPH (N=39)                            | -1.07*       | -1.81       | -0.32       | 0.34*        |
| F-F (N=20)                                    | -0.90        | -1.86       | 0.05        | 0.40         |
| M-F IPH (N=205)                               | -1.43*       | -1.98       | -0.89       | 0.24*        |
| M-F not IPH (N=122)                           | -2.07*       | -2.74       | -1.40       | 0.13*        |
| M-M (N=729)                                   | -0.84*       | -1.31       | -0.36       | 0.43*        |
| <b>Controls</b>                               |              |             |             |              |
| Victim's age                                  | -0.02*       | -0.03       | -0.01       | 0.98*        |
| Offender's age                                | 0.01         | 0.00        | 0.02        | 1.01         |
| <b>Constant</b>                               | <b>1.19*</b> | <b>0.60</b> | <b>1.77</b> | <b>3.28*</b> |

$\chi^2=84.81$ , \* $p<0.05$

<sup>a</sup>Reference category F-MIPH (n=40)

**Appendix 3: Association between homicide type and the dichotomous indicator of four different measures of victim precipitation, logistic regression.**

**Model 3A: Motive was self-defense (N=1,439)**

|                                  | Beta   | 95 % C.I. |       | OR    |
|----------------------------------|--------|-----------|-------|-------|
|                                  |        | Lower     | Upper |       |
| <b>Homicide type<sup>a</sup></b> |        |           |       |       |
| F-M not IPH (N=46)               | -1.06* | -2.08     | -0.04 | 0.35* |
| F-F (N=21)                       | -1.11  | -2.69     | 0.47  | 0.33  |
| M-F IPH (N=274)                  | -3.24* | -4.28     | -2.21 | 0.04* |
| M-F not IPH (N=140)              | -3.38* | -4.87     | -1.88 | 0.03* |
| M-M (N=893)                      | -0.90* | -1.46     | -0.33 | 0.41* |
| <b>Controls</b>                  |        |           |       |       |
| Victim's age                     | -0.03* | -0.04     | -0.01 | 0.97* |
| Offender's age                   | 0.01   | -0.01     | 0.02  | 1.01  |
| <b>Constant</b>                  | 0.08   | -0.74     | 0.90  | 1.08  |

$\chi^2=106.08$ , \* $p<0.05$

<sup>a</sup>Reference category F-MIPH (n=65)

**Model 3B: Motive was to end abuse (N=1,436)**

|                                  | Beta   | 95 % C.I. |       | OR    |
|----------------------------------|--------|-----------|-------|-------|
|                                  |        | Lower     | Upper |       |
| <b>Homicide type<sup>a</sup></b> |        |           |       |       |
| F-M not IPH (N=49)               | -1.30* | -2.19     | -0.42 | 0.27* |
| F-F (N=21)                       | -0.89  | -2.03     | 0.25  | 0.41  |
| M-F IPH (N=270)                  | -2.27* | -2.92     | -1.61 | 0.10* |
| M-F not IPH (N=131)              | -2.65* | -3.56     | -1.73 | 0.07* |
| M-M (N=903)                      | -1.74* | -2.28     | -1.20 | 0.18* |
| <b>Controls</b>                  |        |           |       |       |
| Victim's age                     | -0.01  | -0.02     | 0.00  | 0.99  |
| Offender's age                   | 0.01   | 0.00      | 0.03  | 1.01  |
| <b>Constant</b>                  | -0.11  | -0.87     | 0.64  | 0.89  |

$\chi^2=62.44$ , \* $p<0.05$

<sup>a</sup>Reference category F-MIPH (n=62)

**Model 3C: Prior violence by victim (N=1,325)**

|                                  | Beta         | 95 % C.I.   |             | OR           |
|----------------------------------|--------------|-------------|-------------|--------------|
|                                  |              | Lower       | Upper       |              |
| <b>Homicide type<sup>a</sup></b> |              |             |             |              |
| F-M not IPH (N=45)               | -1.79*       | -2.82       | -0.77       | 0.17*        |
| F-F (N=20)                       | -1.73*       | -3.31       | -0.14       | 0.18*        |
| M-F IPH (N=241)                  | -1.21*       | -1.84       | -0.58       | 0.30*        |
| M-F not IPH (N=134)              | -2.78*       | -3.73       | -1.84       | 0.06*        |
| M-M (N=832)                      | -1.14*       | -1.72       | -0.57       | 0.32*        |
| <b>Controls</b>                  |              |             |             |              |
| Victim's age                     | -0.03*       | -0.04       | -0.02       | 0.97*        |
| Offender's age                   | 0.00         | -0.01       | 0.02        | 1.00         |
| <b>Constant</b>                  | <b>1.00*</b> | <b>0.25</b> | <b>1.74</b> | <b>2.71*</b> |

$\chi^2=78.65$ , \* $p<0.05$

<sup>a</sup>Reference category F-MIPH (n=53)

**Model 3D: Prior threats by victim (N=1,252)**

|                                  | Beta         | 95 % C.I.   |             | OR           |
|----------------------------------|--------------|-------------|-------------|--------------|
|                                  |              | Lower       | Upper       |              |
| <b>Homicide type<sup>a</sup></b> |              |             |             |              |
| F-M not IPH (N=43)               | -1.29*       | -2.24       | -0.34       | 0.28*        |
| F-F (N=21)                       | -1.84*       | -3.44       | -0.24       | 0.16*        |
| M-F IPH (N=230)                  | -1.62*       | -2.32       | -0.93       | 0.20*        |
| M-F not IPH (N=134)              | -2.86*       | -3.83       | -1.89       | 0.06*        |
| M-M (N=779)                      | -1.26*       | -1.88       | -0.64       | 0.28*        |
| <b>Controls</b>                  |              |             |             |              |
| Victim's age                     | -0.03*       | -0.04       | -0.02       | 0.97*        |
| Offender's age                   | 0.00         | -0.01       | 0.02        | 1.00         |
| <b>Constant</b>                  | <b>1.18*</b> | <b>0.38</b> | <b>1.98</b> | <b>3.26*</b> |

$\chi^2=80.54$ , \* $p<0.05$

<sup>a</sup>Reference category F-MIPH (n=45)
